# Supplementary material
Source: publisher figshare collection journal article supplement (https://karger.figshare.com/ndownloader/files/18667457)
Supplement: Supplementary file 1 [file 18667457]

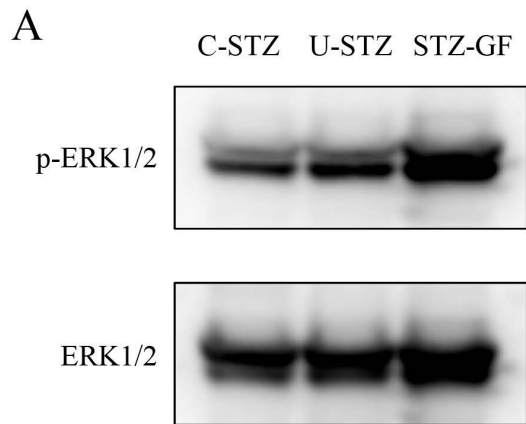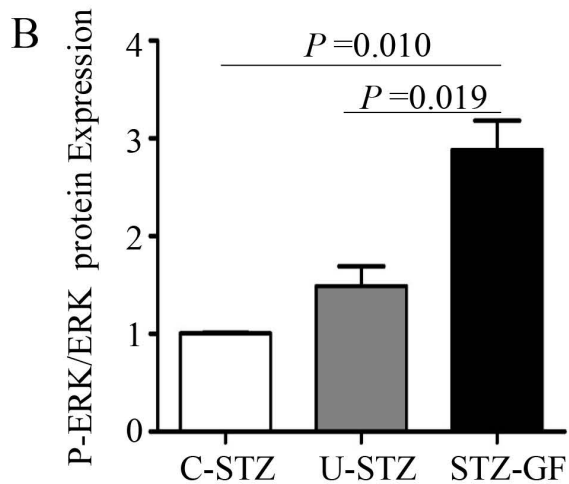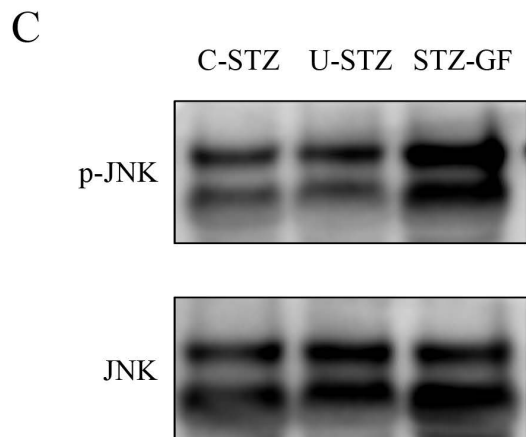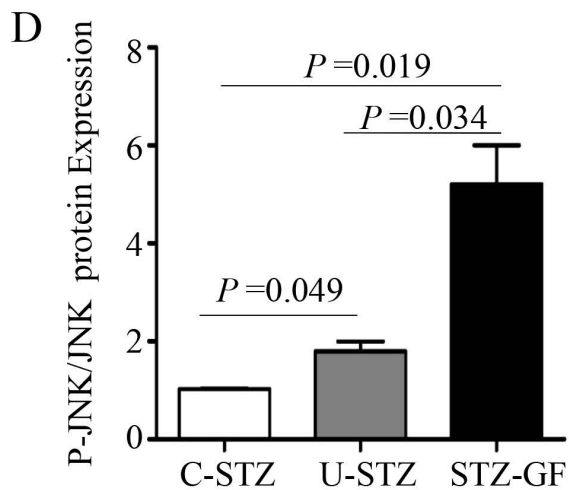

**Fig. S1 Expressions of ERK1/2 and JNK in diabetic rats of three treatment groups** (A-B) The ERK1/2 phosphorylation levels in rat aortas of three groups (n=5 per group). (C-D) The JNK phosphorylation levels in rat aortas of three groups (n=5 per group). \* $P < 0.05$ .
